# Supplementary material for: Evaluating dose of cisplatin responsible for causing nephrotoxicity
Source: PubMed Central journal article supplement (PMC6483206; doi:10.1371/journal.pone.0215757), 2019-04-25
Supplement: pone.0215757.s001.pdf [file pone.0215757.s001.pdf]

|    |    |       |       |     |      |      |      |      |   |   |   |   |   |   |   |   |   |   |   |   |   |   |   |   |   |               |               |     |      |
|----|----|-------|-------|-----|------|------|------|------|---|---|---|---|---|---|---|---|---|---|---|---|---|---|---|---|---|---------------|---------------|-----|------|
| 67 | 60 | 16.74 | 60.00 | 74  | 14.4 | 24.8 | 0.53 | 3.56 | 1 | 1 | 0 | 0 | 0 | 0 | 0 | 1 | 0 | 0 | 0 | 0 | 0 | 0 | 0 | 0 | 0 | head and neck | 4             | 1.5 |      |
| 68 | 61 | 17.50 | 58.82 | 31  | 11.5 | 27.0 | 0.81 | 3.02 | 1 | 1 | 0 | 0 | 0 | 0 | 0 | 1 | 0 | 0 | 0 | 0 | 0 | 0 | 0 | 0 | 0 | 0             | head and neck | 4   | 1.53 |
| 69 | 64 | 20.87 | 59.88 | 81  | 14.7 | 26.4 | 0.82 | 4.42 | 1 | 1 | 0 | 1 | 0 | 1 | 0 | 1 | 0 | 0 | 0 | 0 | 0 | 1 | 1 | 1 | 1 | 0             | head and neck | 4   | 1.67 |
| 70 | 63 | 24.09 | 58.82 | 59  | 15.0 | 26.5 | 0.72 | 4.16 | 1 | 0 | 0 | 1 | 0 | 0 | 0 | 0 | 0 | 0 | 0 | 0 | 0 | 0 | 1 | 1 | 0 | esophageal    | 4             | 1.7 |      |
| 71 | 62 | 19.30 | 60.81 | 49  | 13.9 | 19.3 | 0.90 | 4.23 | 1 | 1 | 0 | 0 | 0 | 0 | 1 | 0 | 0 | 0 | 0 | 0 | 0 | 0 | 0 | 0 | 0 | 0             | head and neck | 4   | 1.48 |
| 72 | 44 | 17.86 | 47.77 | 67  | 14.3 | 25.1 | 0.57 | 4.02 | 1 | 1 | 0 | 0 | 0 | 0 | 0 | 1 | 0 | 0 | 0 | 0 | 0 | 0 | 0 | 0 | 0 | 0             | head and neck | 4   | 1.57 |
| 73 | 63 | 21.36 | 62.11 | 84  | 14.9 | 33.9 | 0.91 | 4.01 | 1 | 1 | 0 | 1 | 0 | 0 | 0 | 1 | 0 | 0 | 0 | 0 | 0 | 1 | 1 | 1 | 1 | 0             | head and neck | 4   | 1.61 |
| 74 | 76 | 18.50 | 54.88 | 50  | 14.1 | 12.0 | 0.84 | 4.82 | 1 | 1 | 1 | 1 | 0 | 1 | 0 | 0 | 0 | 0 | 0 | 0 | 0 | 1 | 1 | 1 | 1 | 0             | head and neck | 4   | 1.64 |
| 75 | 62 | 17.27 | 56.96 | 41  | 12.8 | 18.6 | 0.81 | 3.69 | 1 | 0 | 0 | 0 | 0 | 0 | 0 | 0 | 0 | 0 | 0 | 0 | 0 | 0 | 0 | 0 | 0 | 0             | head and neck | 3   | 1.58 |
| 76 | 55 | 24.15 | 59.46 | 54  | 20.9 | 17.2 | 0.69 | 3.96 | 1 | 1 | 0 | 1 | 0 | 0 | 0 | 1 | 0 | 0 | 0 | 0 | 0 | 1 | 1 | 1 | 1 | 0             | head and neck | 4   | 1.85 |
| 77 | 65 | 23.50 | 59.88 | 50  | 14.2 | 19.6 | 0.62 | 4.23 | 1 | 1 | 0 | 1 | 0 | 0 | 0 | 0 | 0 | 0 | 0 | 0 | 0 | 1 | 0 | 0 | 0 | 0             | head and neck | 2   | 1.67 |
| 78 | 60 | 16.79 | 58.44 | 61  | 11.7 | 28.5 | 0.87 | 3.85 | 1 | 1 | 0 | 0 | 0 | 0 | 0 | 1 | 0 | 0 | 0 | 0 | 0 | 0 | 0 | 0 | 0 | 0             | head and neck | 4   | 1.54 |
| 79 | 60 | 17.70 | 47.47 | 36  | 10.0 | 25.7 | 0.85 | 3.45 | 1 | 1 | 0 | 0 | 0 | 0 | 0 | 0 | 0 | 0 | 0 | 0 | 0 | 0 | 0 | 0 | 0 | 0             | head and neck | 4   | 1.58 |
| 80 | 55 | 22.59 | 58.48 | 52  | 13.5 | 19.9 | 0.78 | 4.05 | 1 | 1 | 0 | 0 | 0 | 0 | 0 | 0 | 0 | 0 | 0 | 0 | 0 | 0 | 0 | 0 | 0 | 0             | head and neck | 3   | 1.71 |
| 81 | 55 | 23.43 | 57.47 | 37  | 12.0 | 23.6 | 0.95 | 3.82 | 1 | 1 | 0 | 0 | 0 | 0 | 0 | 0 | 0 | 0 | 0 | 0 | 0 | 0 | 0 | 0 | 0 | 0             | head and neck | 3   | 1.74 |
| 82 | 41 | 16.95 | 59.21 | 91  | 13.7 | 33.4 | 0.60 | 4.04 | 1 | 1 | 0 | 0 | 0 | 0 | 0 | 1 | 0 | 0 | 0 | 0 | 0 | 0 | 0 | 0 | 0 | 0             | head and neck | 4   | 1.52 |
| 83 | 54 | 16.91 | 58.14 | 90  | 9.4  | 28.8 | 0.67 | 3.46 | 1 | 1 | 0 | 0 | 0 | 0 | 0 | 1 | 0 | 0 | 0 | 0 | 0 | 0 | 0 | 0 | 0 | 0             | head and neck | 4   | 1.29 |
| 84 | 69 | 22.28 | 55.17 | 79  | 12.7 | 30.1 | 0.51 | 3.59 | 1 | 1 | 0 | 0 | 0 | 0 | 0 | 0 | 0 | 0 | 0 | 0 | 0 | 0 | 0 | 0 | 0 | 0             | head and neck | 4   | 1.45 |
| 85 | 69 | 22.15 | 44.83 | 74  | 11.2 | 40.5 | 0.55 | 3.36 | 1 | 1 | 0 | 0 | 0 | 0 | 0 | 0 | 0 | 0 | 1 | 0 | 0 | 0 | 0 | 0 | 0 | 0             | head and neck | 4   | 1.45 |
| 86 | 64 | 19.03 | 61.35 | 157 | 9.0  | 68.5 | 0.73 | 2.42 | 1 | 1 | 0 | 0 | 0 | 0 | 0 | 1 | 0 | 1 | 0 | 0 | 0 | 0 | 0 | 0 | 0 | 0             | head and neck | 4   | 1.63 |
| 87 | 65 | 16.96 | 61.29 | 108 | 10.0 | 39.8 | 0.57 | 2.41 | 1 | 1 | 0 | 0 | 0 | 0 | 0 | 0 | 1 | 0 | 0 | 0 | 0 | 0 | 0 | 0 | 0 | 0             | head and neck | 4   | 1.55 |
